# Supplementary material for: Truncated tetragonal bipyramidal anatase nanocrystals formed without use of capping agents from the supercritical drying of a TiO2sol
Source: Royal Society of Chemistry journal article supplement (doi:10.1039/c5ce02112j), 2015-11-25
Supplement: c5ce02112j1.pdf [file c5ce02112j1.pdf]

*Electronic Supplementary Information*

**Truncated tetragonal bipyramidal anatase nanocrystals formed without use of capping agents from the supercritical drying of a TiO<sub>2</sub> sol**

D.M. Tobaldi,<sup>\*a</sup> R.C. Pullar,<sup>\*a</sup> L. Durães,<sup>b</sup> T. Matias,<sup>b</sup> M.P. Seabra,<sup>a</sup> J.A. Labrincha<sup>a</sup>

<sup>a</sup> *Department of Materials and Ceramic Engineering / CICECO – Aveiro Institute of Materials, University of Aveiro, Campus Universitário de Santiago, 3810-193 Aveiro, Portugal*

<sup>b</sup> *CIEPQPF, Department of Chemical Engineering, Faculty of Sciences and Technology, University of Coimbra, Pólo II, Rua Sílvio Lima, 3030-790 Coimbra, Portugal*

\* Corresponding author. Tel.: +351 234 370 041

*E-mail addresses: [david.tobaldi@ua.pt](mailto:david.tobaldi@ua.pt); [david@davidtobaldi.org](mailto:david@davidtobaldi.org); [rpullar@ua.pt](mailto:rpullar@ua.pt)*

Figure & Captions

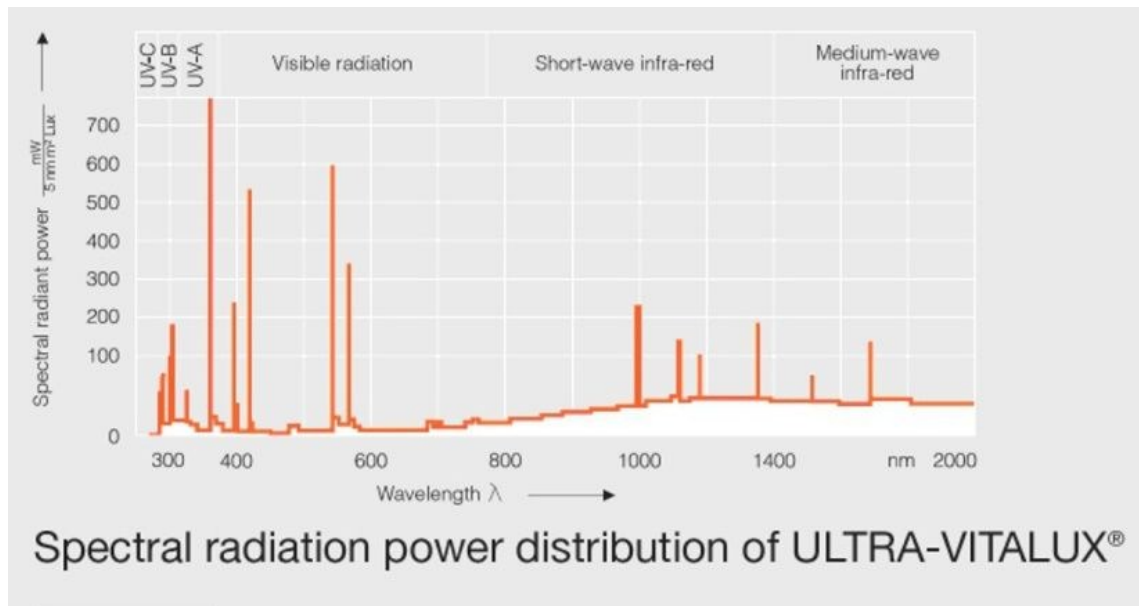

**Fig. S1** – Emission spectrum of the solar lamp used in the PCA tests (Osram Ultra-Vitalux, 300 W).

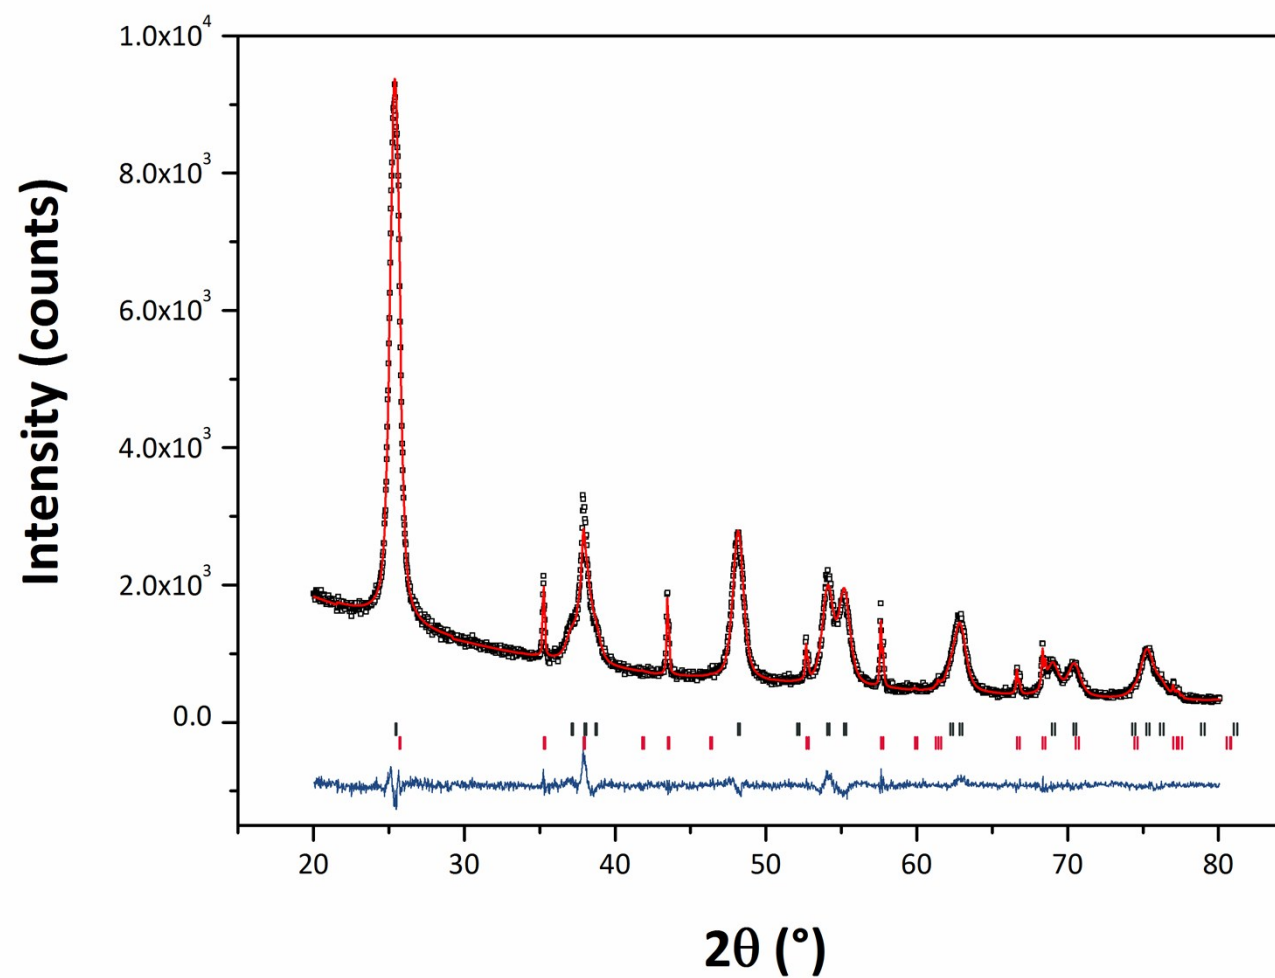

**Fig. S2** – Graphic output of the Rietveld refinement of the sample **Ti-IPA**. The black open squares represent the observed pattern, the red line represent the calculated pattern, and the difference curve between observed and calculated profiles is plotted below. The position of reflections is indicated by the small vertical bars (black: anatase; red: the internal standard used, NIST SRM 676a).

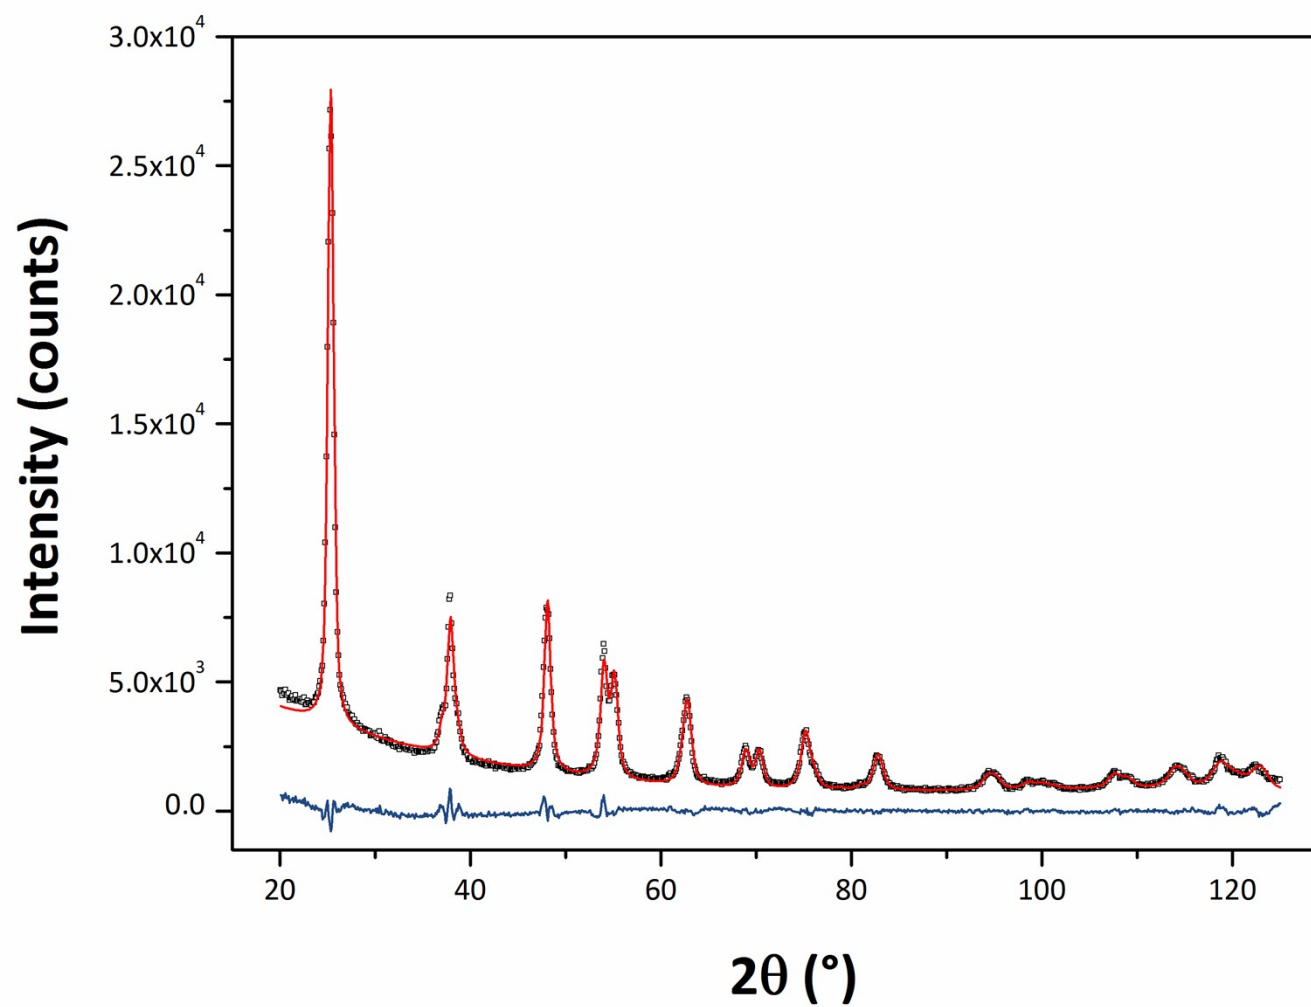

**Fig. S3** – Graphic output of the WPPM modelling (sample **Ti-EtOH**). The black open squares represent the observed data, the red continuous line the calculated data. The blue continuous line in the bottom shows the difference curve between observed and calculated profile.

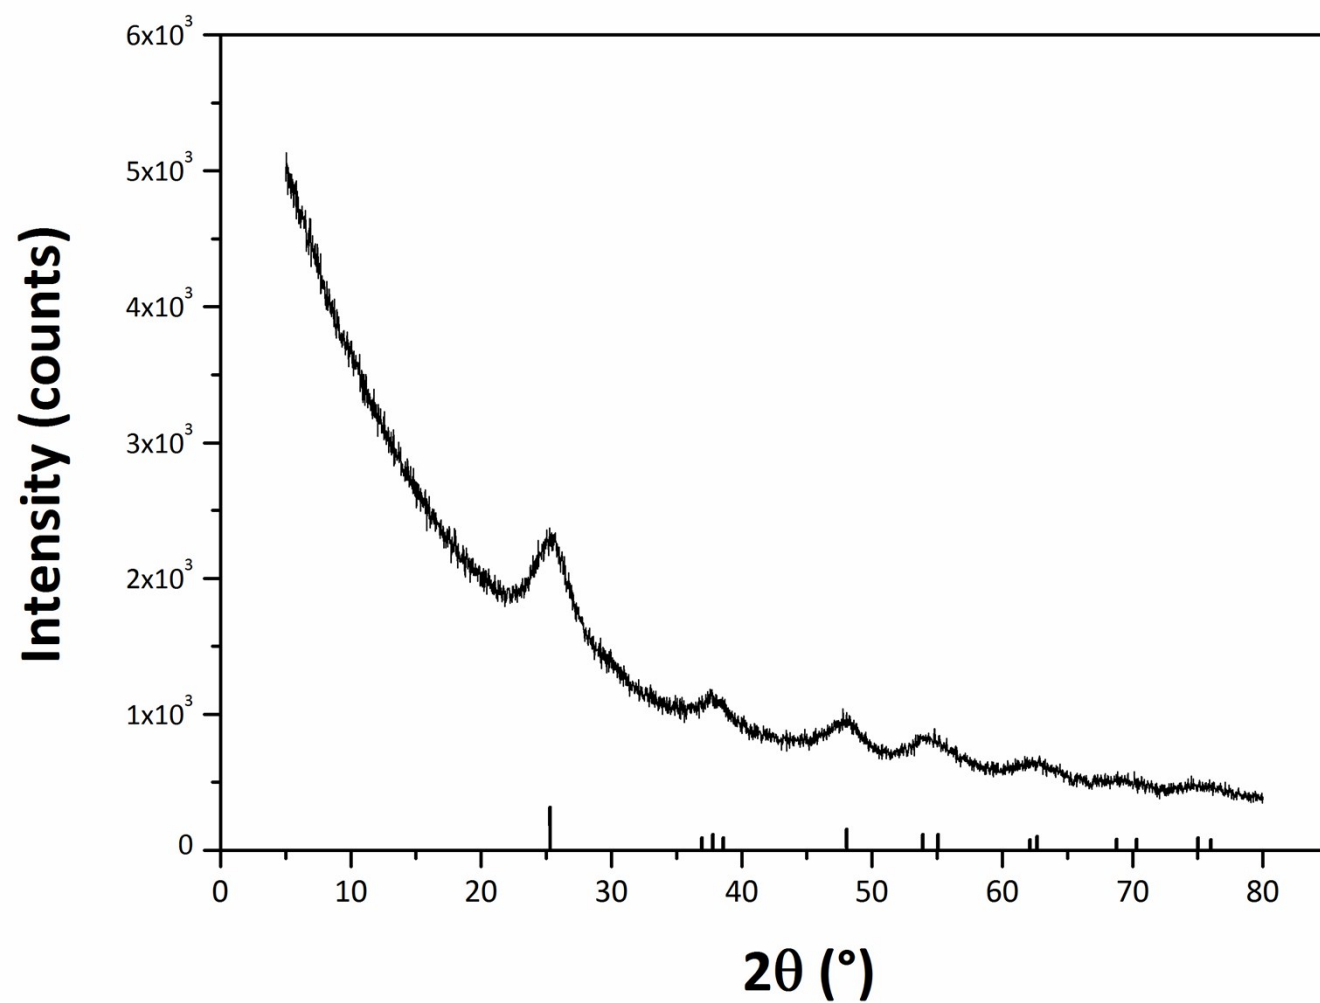

**Fig. S4** – XRD pattern of the Ti sol dried to glassy gel on the rotary evaporator at 60 °C. The vertical black bars represent anatase reflections, from ICDD powder diffraction card # 21-1272.

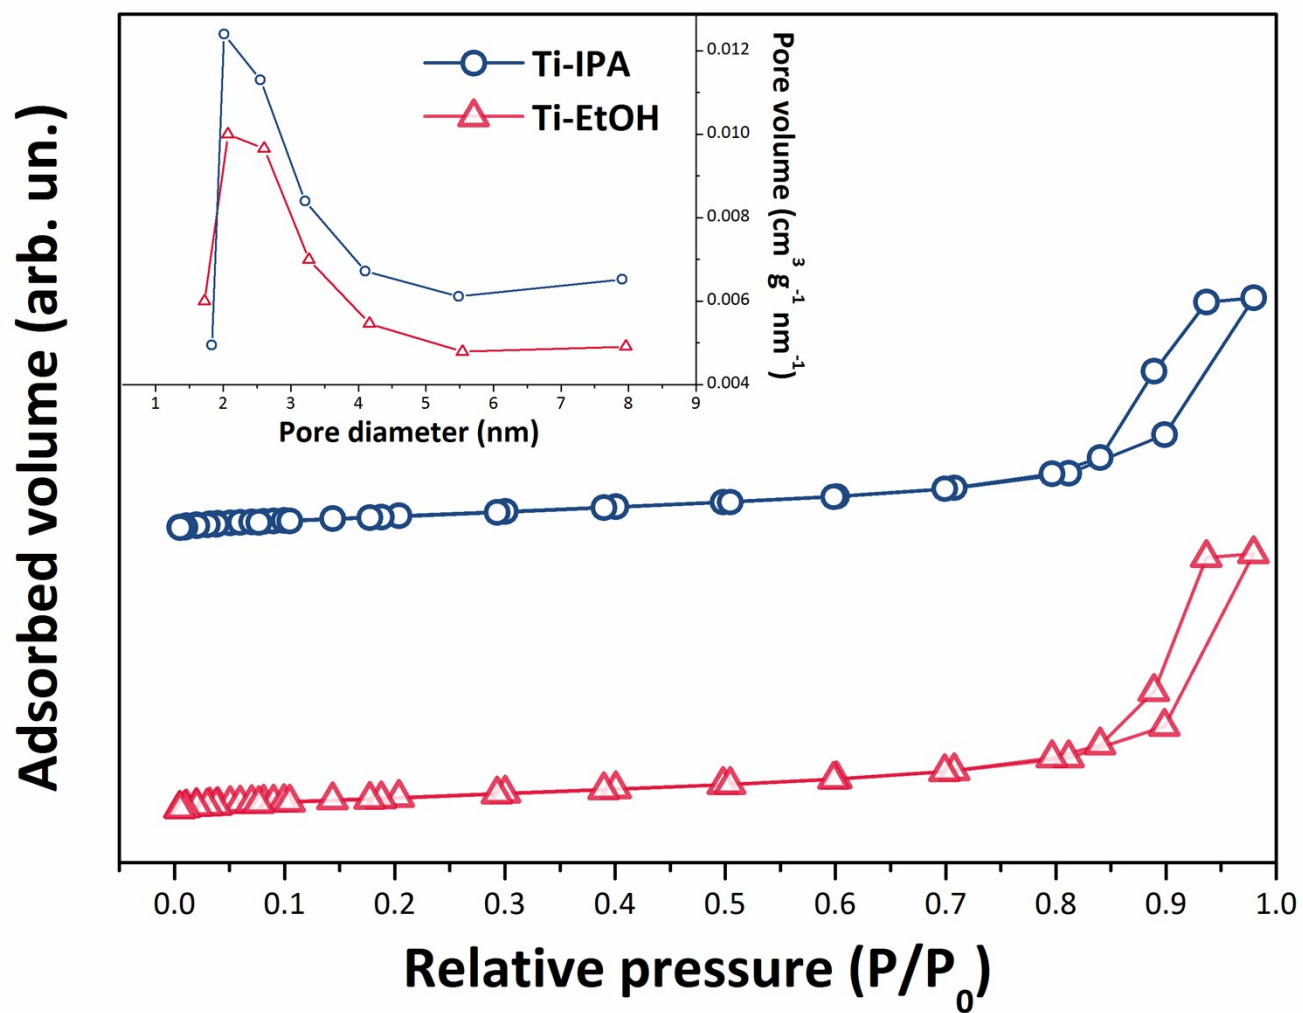

Fig. S5 – Sorption isotherms of samples **Ti-IPA** and **Ti-EtOH**, both of type IV. In the inset is shown the pore-size distribution.

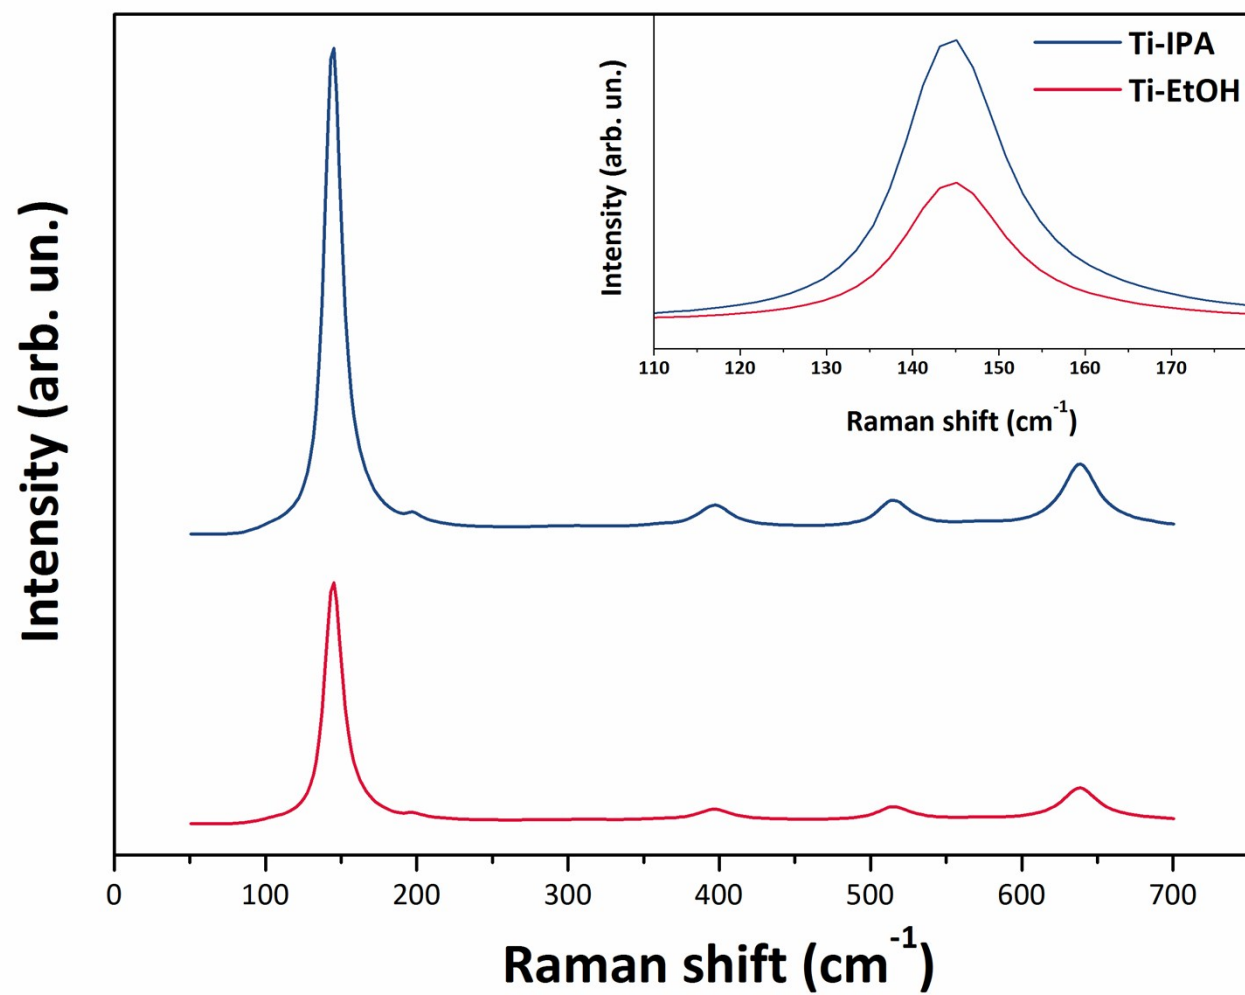

**Fig. S6** – Raman spectra of the samples. In the inset is shown a magnification between 110-180 cm<sup>-1</sup>, to highlight the Raman  $E_g$  active mode of anatase at 144 cm<sup>-1</sup>.

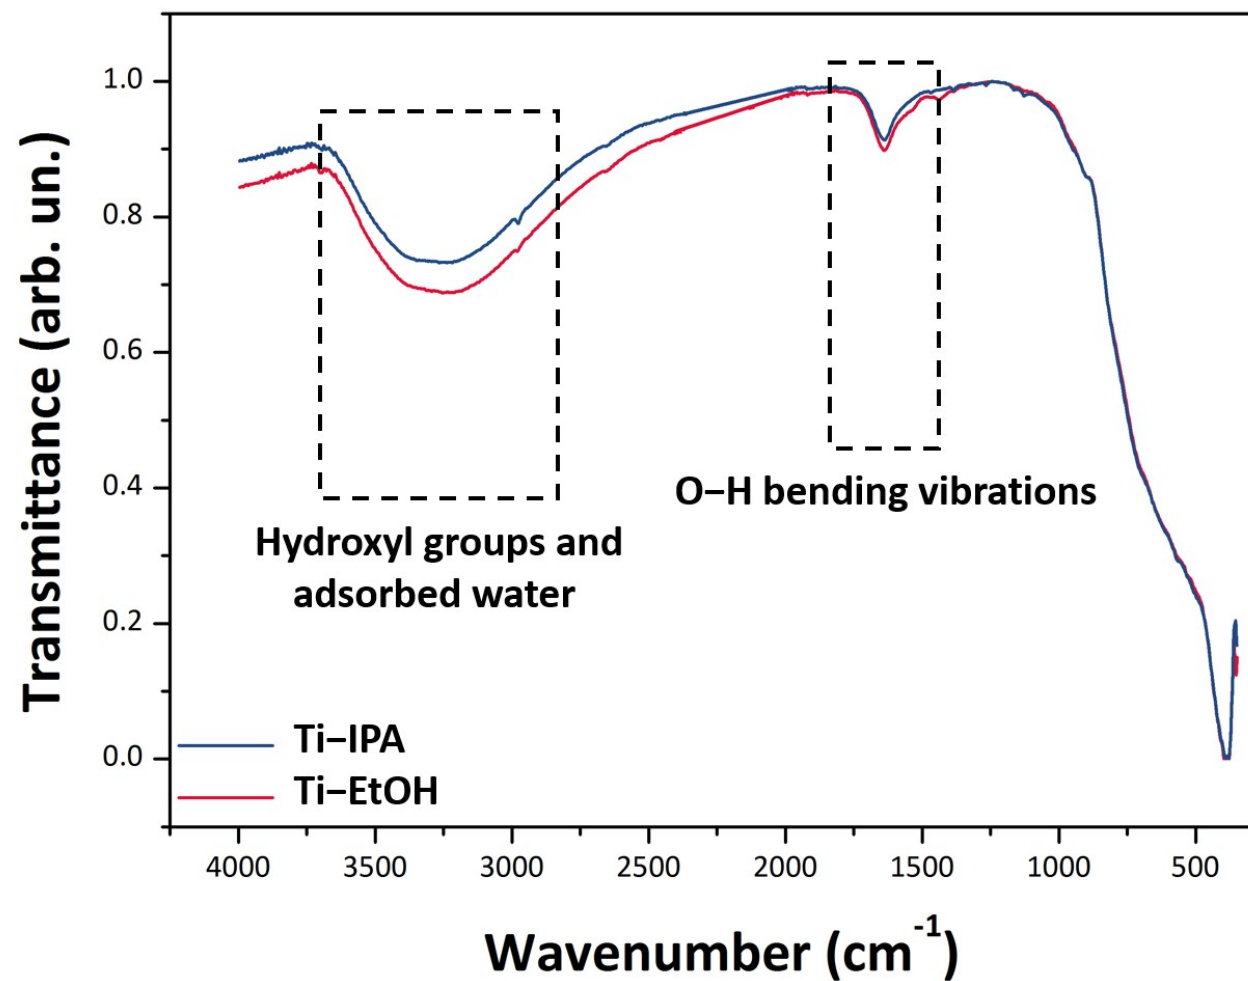

**Fig. S7**– FT-IR spectra of synthesised anatase NPs. The dashed areas are to highlight the regions with hydroxyl groups, adsorbed water, and O–H bending vibrations.
